# Supplementary material
Source: PubMed Central journal article supplement (PMC6171352)
Supplement: NIHMS988964-supplement-supp.pdf [file NIHMS988964-supplement-supp.pdf]

## Supplemental Information

**SUPPLEMENTAL TABLE 6** Patient Characteristics From Hospitals Contributing to the GWTG-R Registry

|                                                                | Events   |      |
|----------------------------------------------------------------|----------|------|
|                                                                | <i>n</i> | %    |
| Gender <sup>a</sup>                                            |          |      |
| Male                                                           | 1966     | 54   |
| Race <sup>b</sup>                                              |          |      |
| White                                                          | 2026     | 55.6 |
| Black                                                          | 865      | 23.8 |
| Hispanic                                                       | 698      | 19.2 |
| Asian/Pacific Islander                                         | 87       | 2.4  |
| American Indian/Eskimo                                         | 10       | 0.3  |
| Unknown/Not documented                                         | 277      | 7.6  |
| Other                                                          | 376      | 10.3 |
| Categorical age, y <sup>c</sup>                                |          |      |
| <1                                                             | 1207     | 33.1 |
| 1–7                                                            | 1183     | 32.5 |
| 8–12                                                           | 457      | 12.5 |
| 13–17                                                          | 797      | 22.9 |
| Illness category                                               |          |      |
| Medical-Cardiac                                                | 208      | 5.7  |
| Medical-Noncardiac                                             | 2677     | 73.4 |
| Surgical-Cardiac                                               | 84       | 2.3  |
| Surgical-Noncardiac                                            | 608      | 16.7 |
| Newborn                                                        | 7        | 0.2  |
| Trauma                                                         | 63       | 1.7  |
| Event location                                                 |          |      |
| General inpatient area                                         | 3080     | 84.4 |
| Telemetry/step-down unit                                       | 567      | 15.6 |
| Admitted within 12 h before MET call <sup>d</sup>              | 721      | 23.6 |
| Admitted within 24 h before MET call <sup>d</sup>              | 1137     | 37.2 |
| Discharged from an ICU before MET call <sup>e</sup>            | 596      | 16.3 |
| Admitted from ED within 24 h before MET call <sup>a</sup>      | 870      | 23.9 |
| Admitted from PACU within 24 h before MET call <sup>f</sup>    | 264      | 7.2  |
| Received conscious sedation/general anesthesia before MET call | 347      | 9.5  |

ED, emergency department; PACU, pediatric acute care unit.

<sup>a</sup> Data obtained from 3646 events.

<sup>b</sup> Data obtained from 3641 events.

<sup>c</sup> Data obtained from 3644 events.

<sup>d</sup> Data obtained from 3059 events.

<sup>e</sup> Data obtained from 3647 events.

<sup>f</sup> Data obtained from 3645 events.

**SUPPLEMENTAL TABLE 7** Characteristics of the Hospitals Contributing to the GWTG-R MET Registry

| Characteristics                                                         | Hospitals ( <i>n</i> ) | Events   |      |
|-------------------------------------------------------------------------|------------------------|----------|------|
|                                                                         |                        | <i>n</i> | %    |
| <b>Hospital location<sup>a</sup></b>                                    |                        |          |      |
| Rural                                                                   | 13                     | 39       | 1.1  |
| Urban                                                                   | 122                    | 3433     | 98.9 |
| <b>Teaching Status<sup>a</sup></b>                                      |                        |          |      |
| Major teaching                                                          | 32                     | 2815     | 81.1 |
| Minor teaching                                                          | 47                     | 429      | 12.4 |
| Nonteaching                                                             | 56                     | 228      | 6.6  |
| <b>Primary service population<sup>a</sup></b>                           |                        |          |      |
| Child                                                                   | 9                      | 1829     | 52.7 |
| General medical-surgical                                                | 126                    | 1643     | 47.3 |
| <b>Census region categories (geographic)<sup>a</sup></b>                |                        |          |      |
| North Mid-Atlantic                                                      | 14                     | 611      | 17.6 |
| South Atlantic                                                          | 40                     | 1011     | 29.1 |
| North Central                                                           | 24                     | 266      | 7.7  |
| South Central                                                           | 27                     | 1395     | 40.2 |
| Mountain/Pacific                                                        | 30                     | 189      | 5.4  |
| <b>Ownership<sup>a</sup></b>                                            |                        |          |      |
| Nonprofit                                                               | 71                     | 2984     | 85.9 |
| Church                                                                  | 25                     | 80       | 2.3  |
| State/local government                                                  | 18                     | 279      | 8.0  |
| Investor                                                                | 19                     | 127      | 3.7  |
| VA/Military                                                             | 2                      | 2        | 0.06 |
| <b>Facility total bed size<sup>b</sup></b>                              |                        |          |      |
| <100                                                                    | 5                      | 15       | 0.43 |
| 100–199                                                                 | 14                     | 151      | 4.4  |
| 200–249                                                                 | 16                     | 369      | 10.6 |
| 250–299                                                                 | 16                     | 198      | 5.7  |
| 300–349                                                                 | 14                     | 403      | 11.6 |
| 350–499                                                                 | 30                     | 1084     | 31.2 |
| 500+                                                                    | 31                     | 1252     | 36.1 |
| <b>Facility general medical/surgical pediatric Bed Size<sup>c</sup></b> |                        |          |      |
| 0                                                                       | 23                     | 100      | 3.0  |
| <10                                                                     | 8                      | 86       | 2.6  |
| 10–19                                                                   | 11                     | 143      | 4.3  |
| 20–29                                                                   | 9                      | 55       | 1.7  |
| 30–49                                                                   | 8                      | 512      | 15.3 |
| 50–79                                                                   | 10                     | 187      | 5.6  |
| 80+                                                                     | 0                      | 2257     | 67.6 |
| <b>Pediatric ICU bed size<sup>d</sup></b>                               |                        |          |      |
| 0                                                                       | 81                     | 367      | 10.9 |
| <10                                                                     | 14                     | 54       | 1.6  |
| 10–19                                                                   | 16                     | 726      | 21.6 |
| 20+                                                                     | 11                     | 2216     | 65.9 |

<sup>a</sup> Data from 135 hospitals.

<sup>b</sup> Data from 126 hospitals.

<sup>c</sup> Data from 69 hospitals.

<sup>d</sup> Data from 122 hospitals.
